# Supplementary material for: Heterostructural MoS2/NiS nanoflowers via precise interface modification for enhancing electrocatalytic hydrogen evolution
Source: Royal Society of Chemistry journal article supplement (doi:10.1039/d1nj05873h), 2022-01-01
Supplement: d1nj05873h1.pdf [file d1nj05873h1.pdf]

## Supporting Information

### **Heterostructural MoS<sub>2</sub>/NiS nanoflowers via precise interface modification for enhancing electrocatalytic hydrogen evolution**

Xiwang Zhao<sup>a</sup>, Jiehua Bao<sup>a</sup>, Yuming Zhou<sup>a\*</sup>, Yiwei Zhang<sup>a</sup>, Xiaoli Sheng<sup>a</sup>, Bo Wu<sup>b\*</sup>,

Yanyun Wang<sup>a</sup>, Changjiang Zuo<sup>a</sup>, Xiaohai Bu<sup>c</sup>

<sup>a</sup>Jiangsu Optoelectronic Functional Materials and Engineering Laboratory, School of Chemistry and Chemical Engineering, Southeast University, Nanjing 211189, P. R. China.

<sup>b</sup>Multiscale Computational Materials Facility, Key Laboratory of Eco-Materials Advanced Technology, College of Materials Science and Engineering, Fuzhou University, Fuzhou 350100, P. R. China.

<sup>c</sup>School of Materials Engineering, Nanjing Institute of Technology, Nanjing 211167, P. R. China

---

\* Corresponding authors:

E-mail: [ymzhou@seu.edu.cn](mailto:ymzhou@seu.edu.cn) (Y, Zhou)

[wubo@fzu.edu.cn](mailto:wubo@fzu.edu.cn) (B, Wu)

Tel./Fax: +86 25 52090617

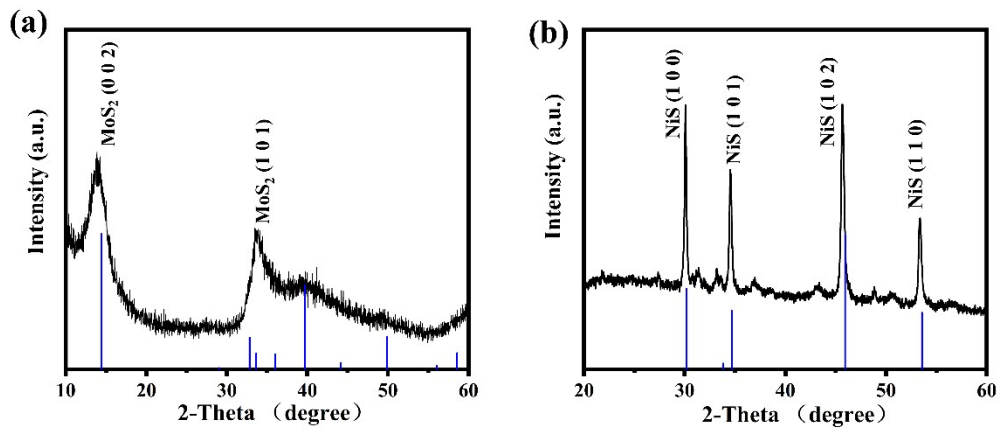

**Figure S1** (a) The XRD patterns of pure MoS<sub>2</sub>. (b) The XRD patterns of pure NiS nanostructures.

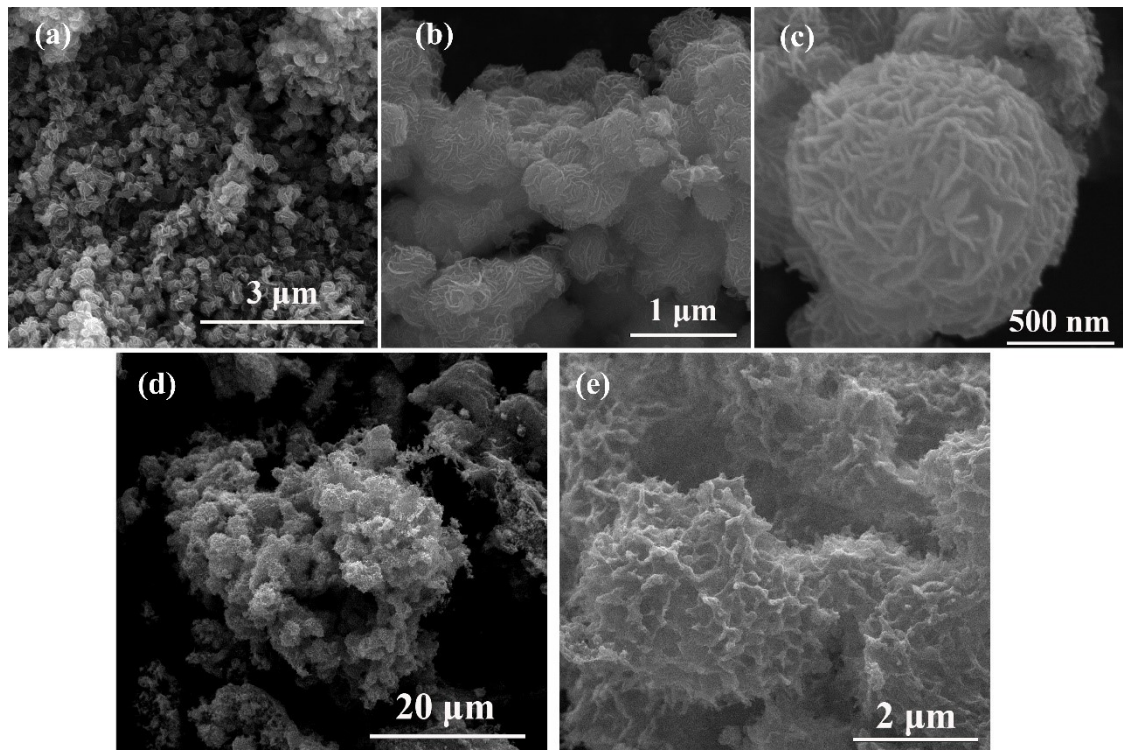

**Figure S2** Different scale bar SEM images of the MoS<sub>2</sub> flowers like heterostructures (a) 3 μm, (b) 1 μm, (c) 500 nm. Different scale bar SEM images of the NiS nanostructures (d) 20 μm, (e) 2 μm.

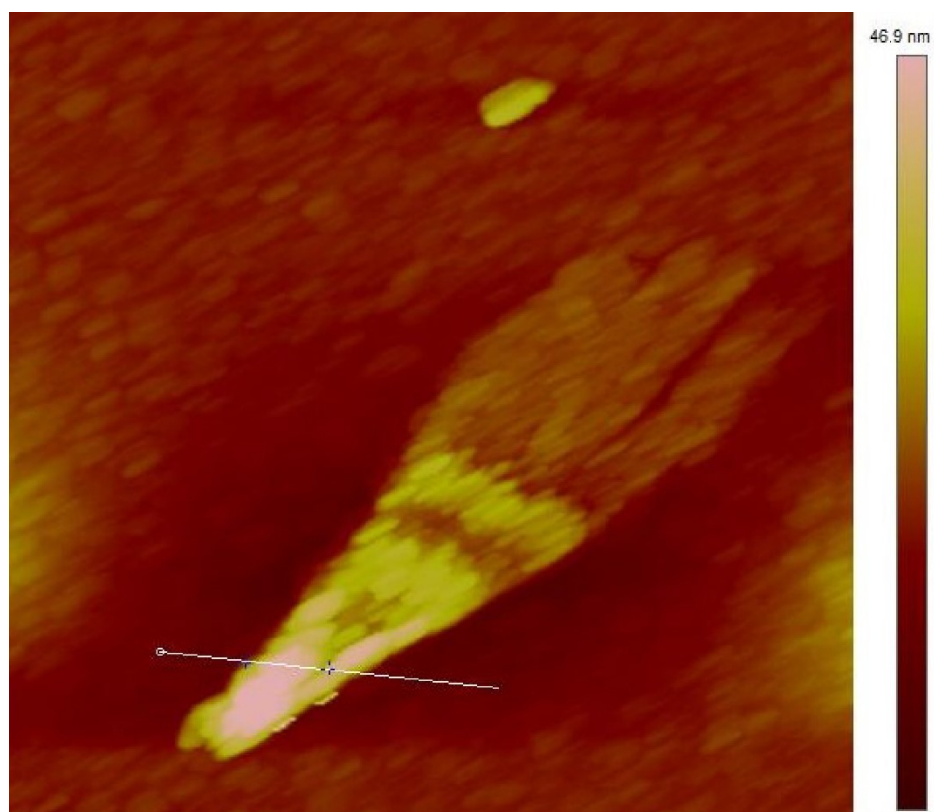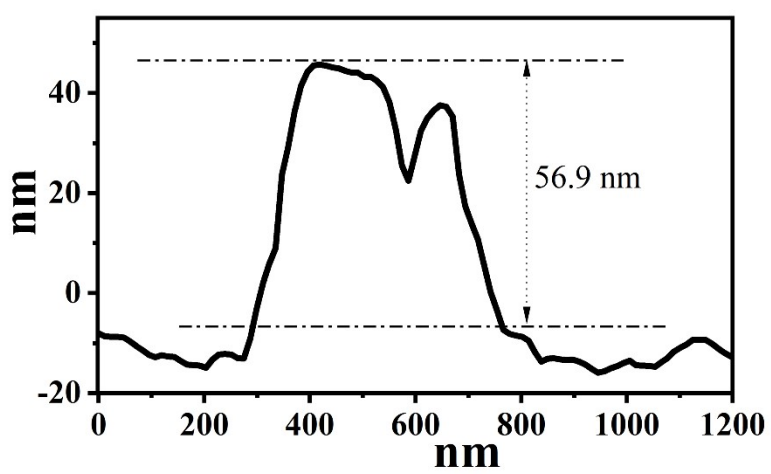

Figure S3 AFM image (top) and its height profile (bottom) along the white line of the MoS<sub>2</sub>.

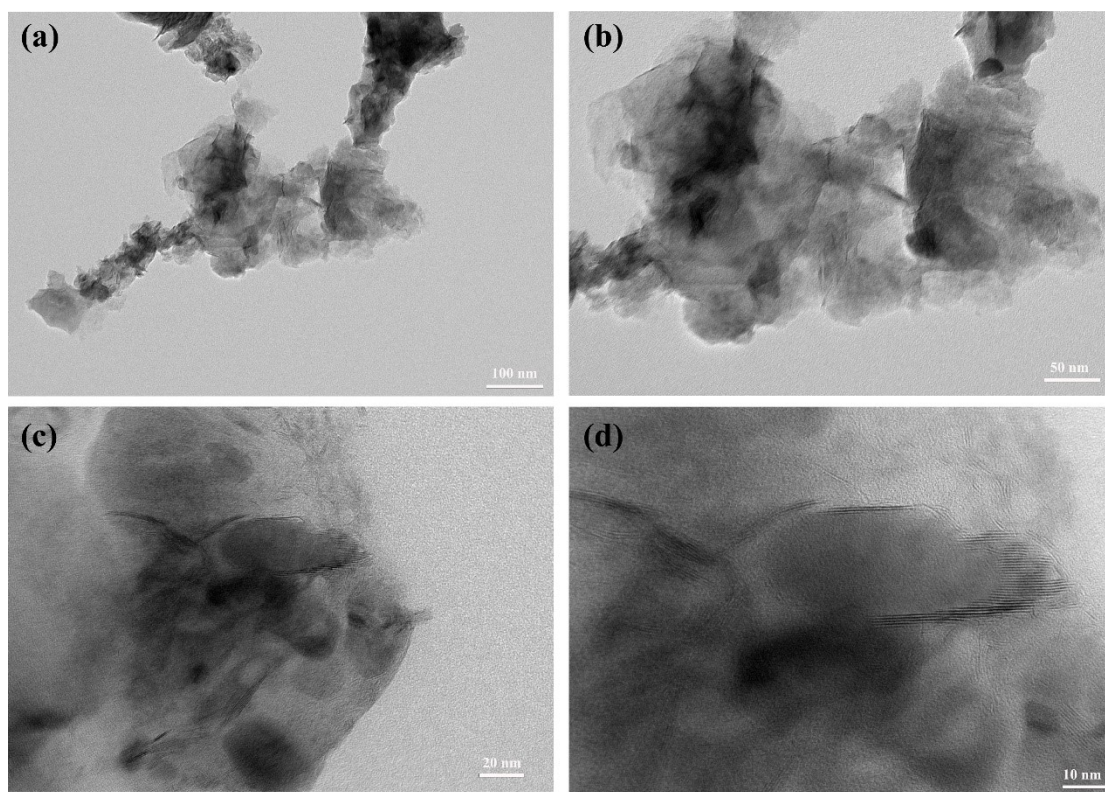

**Figure S4** Different scale bar TEM images of the MoS<sub>2</sub>/NiS flowers like heterostructures (a) 100 nm, (b) 50 nm, (c) 20 nm, (d) 10 nm.

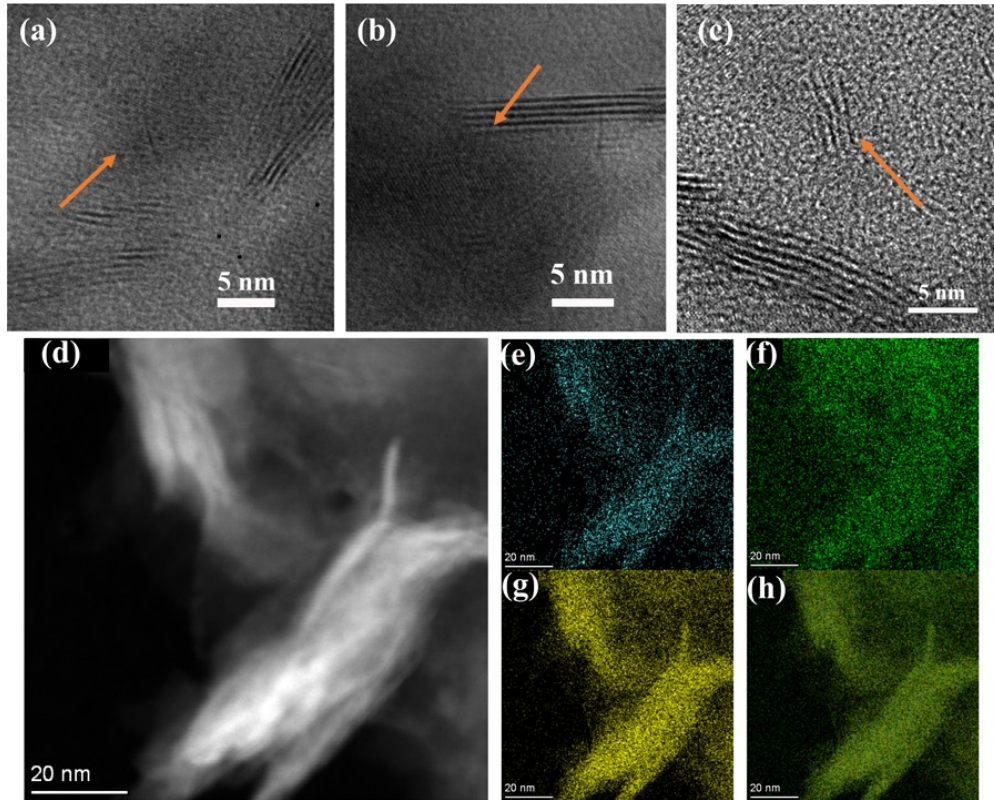

**Figure S5** (a-c) The interface of the constructed MoS<sub>2</sub>/NiS heterostructures. (d) The high-angle annular dark-field (HAADF) STEM image of MoS<sub>2</sub>/NiS heterostructures and corresponding elemental mapping images of (e) Mo, (f) Ni, (g) S, and (h) overlap of the Mo, Ni, S.

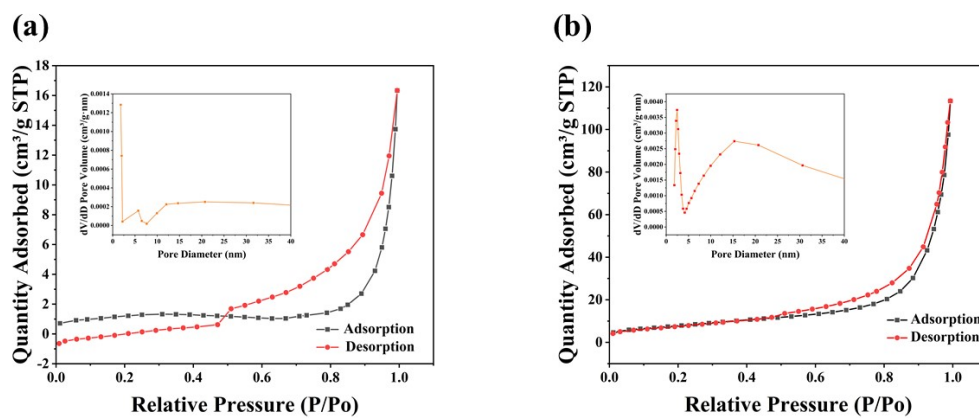

**Figure S6** N<sub>2</sub> adsorption-desorption isotherm of (a) MoS<sub>2</sub>, (b) MoS<sub>2</sub>/NiS flowers like heterostructures, inset is the corresponding pore size distribution curve.

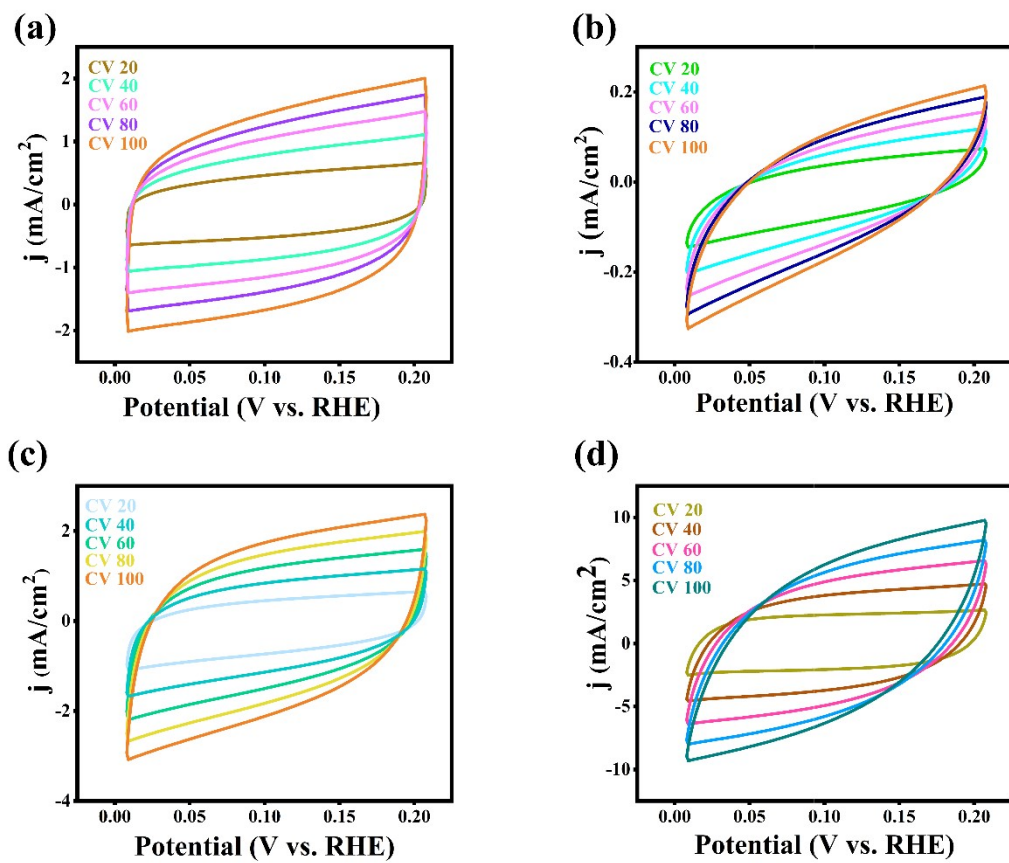

**Figure S7** CV curves of (a) MoS<sub>2</sub>, (b) NiS, (c) MoS<sub>2</sub>/NiS flowers like heterostructures and (d) Pt/C.

At scan rates of 20, 40, 60, 80, 100 mV s<sup>-1</sup> in 1.0 M KOH, respectively.



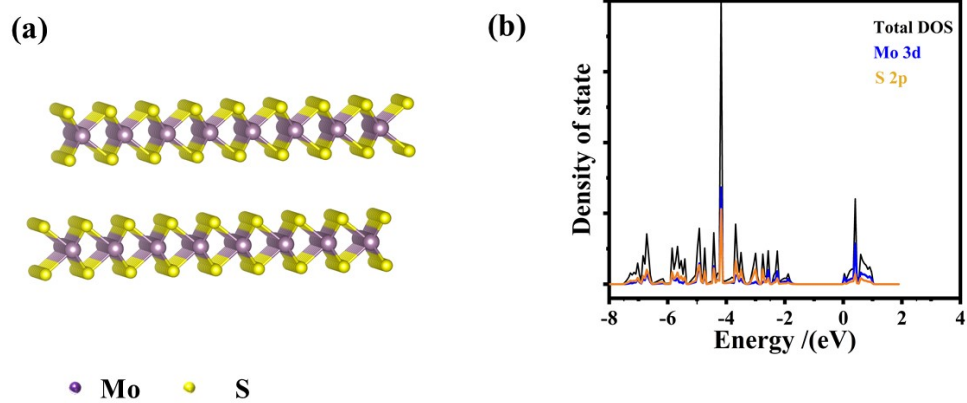

**Figure S8** (a) MoS<sub>2</sub> (0 0 2) plane, (b) and the projected density of states of MoS<sub>2</sub> (0 0 2) plane.

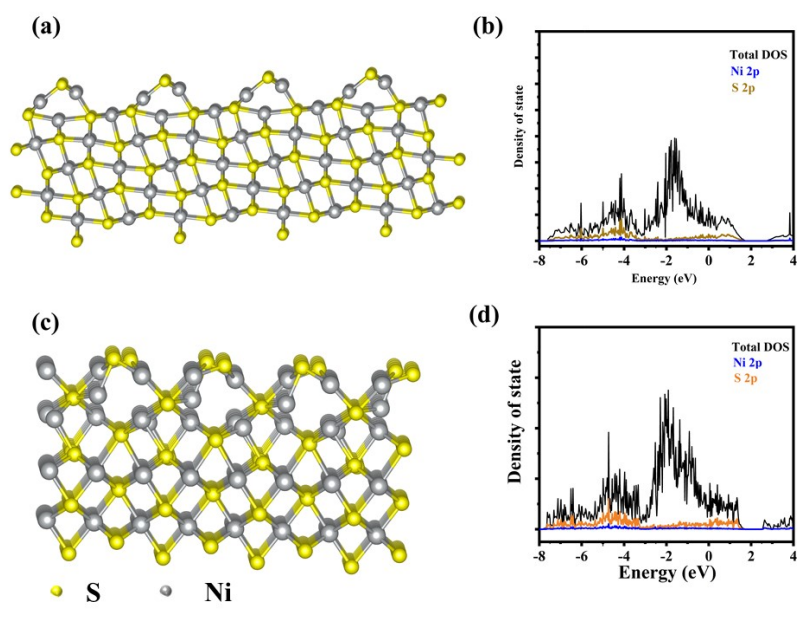

**Figure S9** (a) NiS (1 0 2) plane, (b) and the projected density of states of NiS (1 0 2) plane, (c) NiS (1 0 0) plane, (d) and the projected density of states of NiS (1 0 0) plane.

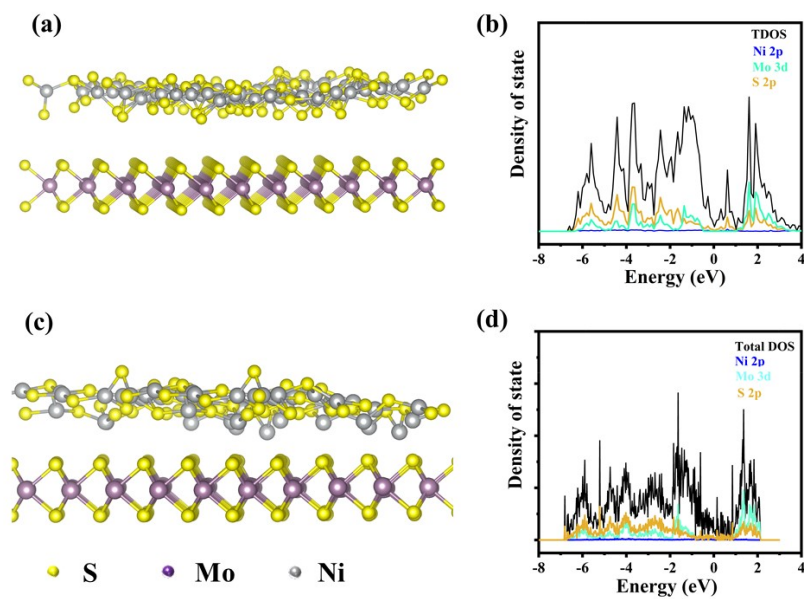

**Figure S10** (a) Heterostructures constructed by using MoS<sub>2</sub> (0 0 2) crystal surface and NiS (1 0 0) crystal surface. (b) And the projected density of states of MoS<sub>2</sub>/NiS heterostructures. (c) Heterostructures constructed by using MoS<sub>2</sub> (0 0 2) crystal surface and NiS (1 0 2) crystal surface, (d) and the projected density of states of MoS<sub>2</sub>/NiS heterostructures.

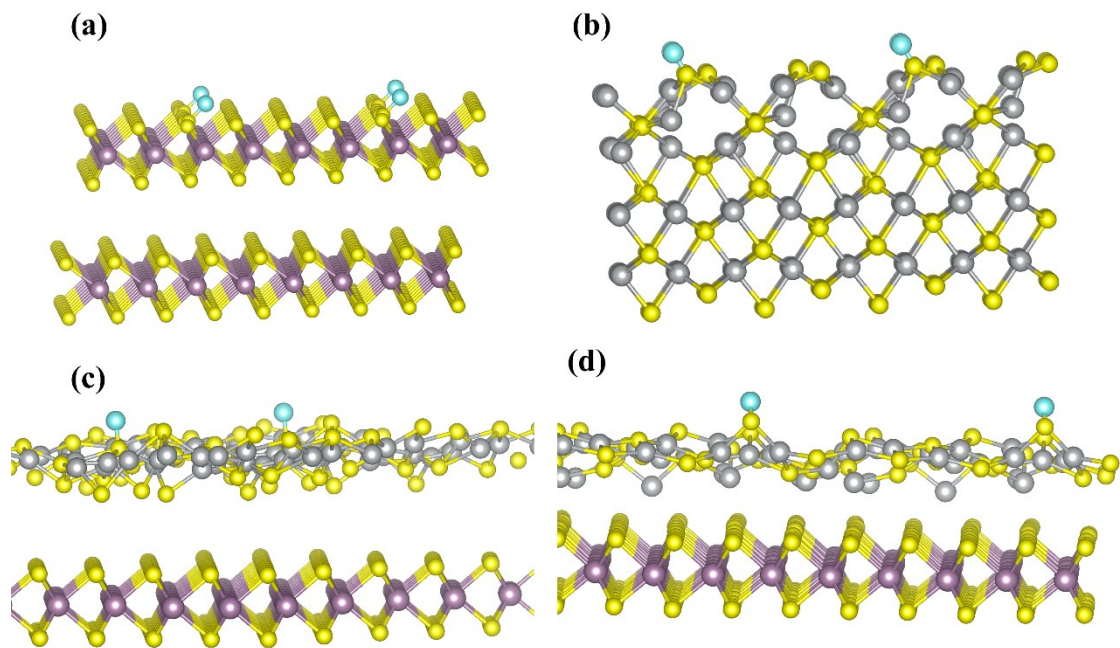

**Figure S11** Hydrogen atoms adsorb on different DFT chemisorption models. (a) Hydrogen atoms adsorb on the MoS<sub>2</sub> (0 0 2) basal plane sites, (b) hydrogen atoms adsorb on the NiS (1 0 0) plane, (c) hydrogen atoms adsorb on the heterogeneous structure constructed by using MoS<sub>2</sub> (0 0 2) crystal surface and NiS (1 0 0) crystal surface, (d) hydrogen atoms adsorb on the heterogeneous structure constructed by using MoS<sub>2</sub> (0 0 2) crystal surface and NiS (1 0 2) crystal surface.

| <b>DFT models</b>                   | <b>E<sub>0</sub> (eV)</b> | <b>ΔG (eV)</b> | <b>ΔG<sub>H*</sub> (eV)</b> |
|-------------------------------------|---------------------------|----------------|-----------------------------|
| NiS (1 0 0) _slab                   | -633.777                  | 0              |                             |
| NiS (1 0 0) _H                      | -636.670                  | 0.216          | 0.703                       |
| MoS <sub>2</sub> (0 0 2) _slab      | -1395.438                 | 0              |                             |
| MoS <sub>2</sub> (0 0 2) _H         | -1397.132                 | 0.173          | 1.859                       |
| MoS <sub>2</sub> (1 0 0) _slab      | -662.197                  | 0              |                             |
| MoS <sub>2</sub> (1 0 0) _H         | -666.361                  | 0.231          | -0.553                      |
| MoS <sub>2</sub> /NiS (1 0 0) _slab | -1032.172                 | 0              |                             |
| MoS <sub>2</sub> /NiS (1 0 0) _H    | -1035.277                 | 0.220          | 0.525                       |
| MoS <sub>2</sub> /NiS (1 0 2) _slab | -1062.910                 | 0              |                             |
| MoS <sub>2</sub> /NiS (1 0 2) _H    | -1066.030                 | 0.222          | 0.482                       |

**Table S1** The specific values of the surface energy of different slabs and the surface energy of hydrogen adsorption models.

| Samples                                                           | $\eta_{10}$<br>(mV) | Tafel<br>(mV dec <sup>-1</sup> ) | Ref.             |
|-------------------------------------------------------------------|---------------------|----------------------------------|------------------|
| 1T-2H Cr <sub>x</sub> -MoS <sub>2</sub> Ultrathin<br>Nanosheets   | 200                 | 41.6                             | 1                |
| Al-MoS <sub>2</sub>                                               | 198                 | 134                              | 2                |
| VNMS                                                              | 122                 | 57                               | 3                |
| MoS <sub>2</sub> QDs/NiO NSs                                      | 186                 | 73.5                             | 4                |
| Co-Ni-P/MoS <sub>2</sub>                                          | 116                 | 41                               | 5                |
| K-G <sub>4.0</sub> T <sub>2.0</sub> Mo <sub>1.0</sub>             | 173                 | 66.4                             | 6                |
| MoS <sub>2</sub> /NiS-Ni <sub>3</sub> S <sub>2</sub> /NF          | 181                 | 70                               | 7                |
| MoS <sub>2</sub> /Ni <sub>3</sub> S <sub>2</sub> foam             | 190                 | 65.6                             | 8                |
| Cu <sub>9</sub> S <sub>5</sub> @MoS <sub>2</sub> /CNFs            | 114                 | 199                              | 9                |
| MoNiCNTs-4                                                        | 238                 | 84                               | 10               |
| Ni <sub>2</sub> P/MoS <sub>2</sub>                                | 149                 | 69.5                             | 11               |
| NCN-CoMoS-700                                                     | 126                 | 74.1                             | 12               |
| S-MoS <sub>2</sub> @C                                             | 155                 | 78                               | 13               |
| MoS <sub>2</sub> /FNS/FeNi foam                                   | 122                 | 45.1                             | 14               |
| Single-layer MoS <sub>2</sub>                                     | 185                 | 45                               | 15               |
| MoS <sub>2</sub> /Ni <sub>3</sub> S <sub>2</sub> heterostructures | 110                 | 83                               | 16               |
| <b>MoS<sub>2</sub>/NiS heterostructures</b>                       | <b>158</b>          | <b>128.1</b>                     | <b>This work</b> |

**Table S2.** Comparison of HER performance of electrocatalysts reported in different literatures in alkaline solution.

## References

1. Jian, J.; Li, H.; Sun, X.; Kong, D.; Zhang, X.; Zhang, L.; Yuan, H.; Feng, S. *ACS Sustain. Chem. Eng.*, 2019, **7**, (7), 7227-7232.
2. Jian, J.; Li, Y.; Bi, H.; Wang, X.; Wu, X.; Qin, W. *ACS Sustain. Chem. Eng.*, 2020, **8**, (11), 4547-4554.
3. Bolar, S.; Shit, S.; Murmu, N. C.; Samanta, P.; Kuila, T. *ACS Appl. Mater. Inter.*, 2021, **13**, (1), 765-780.
4. Zhan, G.; Zhang, J.; Wang, Y.; Yu, C.; Wu, J.; Cui, J.; Shu, X.; Qin, Y.; Zheng, H.; Sun, J.; Yan, J.; Zhang, Y.; Tiwary, C. S.; Wu, Y. *J. Colloid Interf. Sci.*, 2020, **566**, 411-418.
5. Bao, J.; Zhou, Y.; Zhang, Y.; Sheng, X.; Wang, Y.; Liang, S.; Guo, C.; Yang, W.; Zhuang, T.; Hu, Y. *J. Mater. Chem. A*, 2020, **8**, (42), 22181-22190.
6. Zhang, W.; Yu, H.; Tang, D.; Huang, Y.; Wang, J.; Yang, L.; Zhao, Z. *Int. J. Hydrogen Energ.*, 2021, **46**, (27), 13936-13945.
7. Guan, Y.; Xuan, H.; Li, H.; Han, P. *Electrochim. Acta*, 2019, **320**, 134614.
8. Narasimman, R.; Waldiya, M.; K, J.; Vemuri, S. K.; Mukhopadhyay, I.; Ray, A. *Int. J. Hydrogen Energ.*, 2021, 2021, **46**, (11), 7759-7771.
9. Zhang, Z.; Zhu, H.; Hao, J.; Lu, S.; Duan, F.; Xu, F.; Du, M. *J. Colloid Interf. Sci.*, 2021, **595**, 88-97.
10. Zhang, X.; Yang, P.; Jiang, S. P. *Carbon*, 2021, **175**, 176-186.
11. Kim, M.; Anjum, M. A. R.; Lee, M.; Lee, B. J.; Lee, J. S. *Adv. Funct. Mater.*, 2019, **29**, (10), 1809151.

12. Kim, M.; Seok, H.; Clament Sagaya Selvam, N.; Cho, J.; Choi, G. H.; Nam, M. G.; Kang, S.; Kim, T.; Yoo, P. J. *J. Power Sources*, 2021, **493**, 229688.
13. Xu, Q.; Liu, Y.; Jiang, H.; Hu, Y.; Liu, H.; Li, C. *Adv. Energy. Mater.*, 2019, **9**, (2), 1802553 .
14. Wu, Y.; Li, F.; Chen, W.; Xiang, Q.; Ma, Y.; Zhu, H.; Tao, P.; Song, C.; Shang, W.; Deng, T.; Wu, J. *Adv. Mater.*, 2018, **30**, (38), 1803151.
15. Wan, Y.; Zhang, Z.; Xu, X.; Zhang, Z.; Li, P.; Fang, X.; Zhang, K.; Yuan, K.; Liu, K.; Ran, G.; Li, Y.; Ye, Y.; Dai, L. *Nano Energy*, 2018, **51**, 786-792.
16. Zhang, J.; Wang, T.; Pohl, D.; Rellinghaus, B.; Dong, R.; Liu, S.; Zhuang, X.; Feng, X. *Angew. Chem., Int. Ed.*, 2016, **55**, (23), 6702-6707.
